# Supplementary material
Source: PubMed Central journal article supplement (PMC5865264)
Supplement: Supp_Figure1.pdf [file Supp_Figure1.pdf]

## Supplementary Data

```
CTCGAAGTGCCCGCCCTGGCTGACTTCAATAGGGCCTGGACTGAGCTCACCGACTGGCTGTCCCTGCTCGATCGCGTGATCAAG  
TTCAGCGCGTGATGGTCGGCGACCTGGAGGATATTAACGAAATGATCATCAAGCAGAAGGCCACCCTCCAGGACCTGGAGCAG  
CGAAGGCCCCAGCTCGAGGAACTGATCACAGCCGCTCAGAACCTGAAAAATAAGACTTCCAATCAGGAGGCCCGGACAATCATT  
ACTGACAGAATCGAACGAATTCAGTCTCAGTGGGATGAGGTGCAGGAACACCTGCAGAACCGCCGGCAGCAGCTCAACGAAATG  
CTCAAAGATTCAACCCAGTGGCTCGAGGCTAAAGAGGAG
```

**Supplementary Figure 1.** Nucleotide sequence of the ~0.4-kb highly recombinogenic region used in the generation of the 7-kb mini-dystrophin dual AAV vectors in this study. This region includes part of hinge 3, whole spectrin-like repeat R20, and part of R21.

---
