# Supplementary material
Source: PubMed Central journal article supplement (PMC5865264)

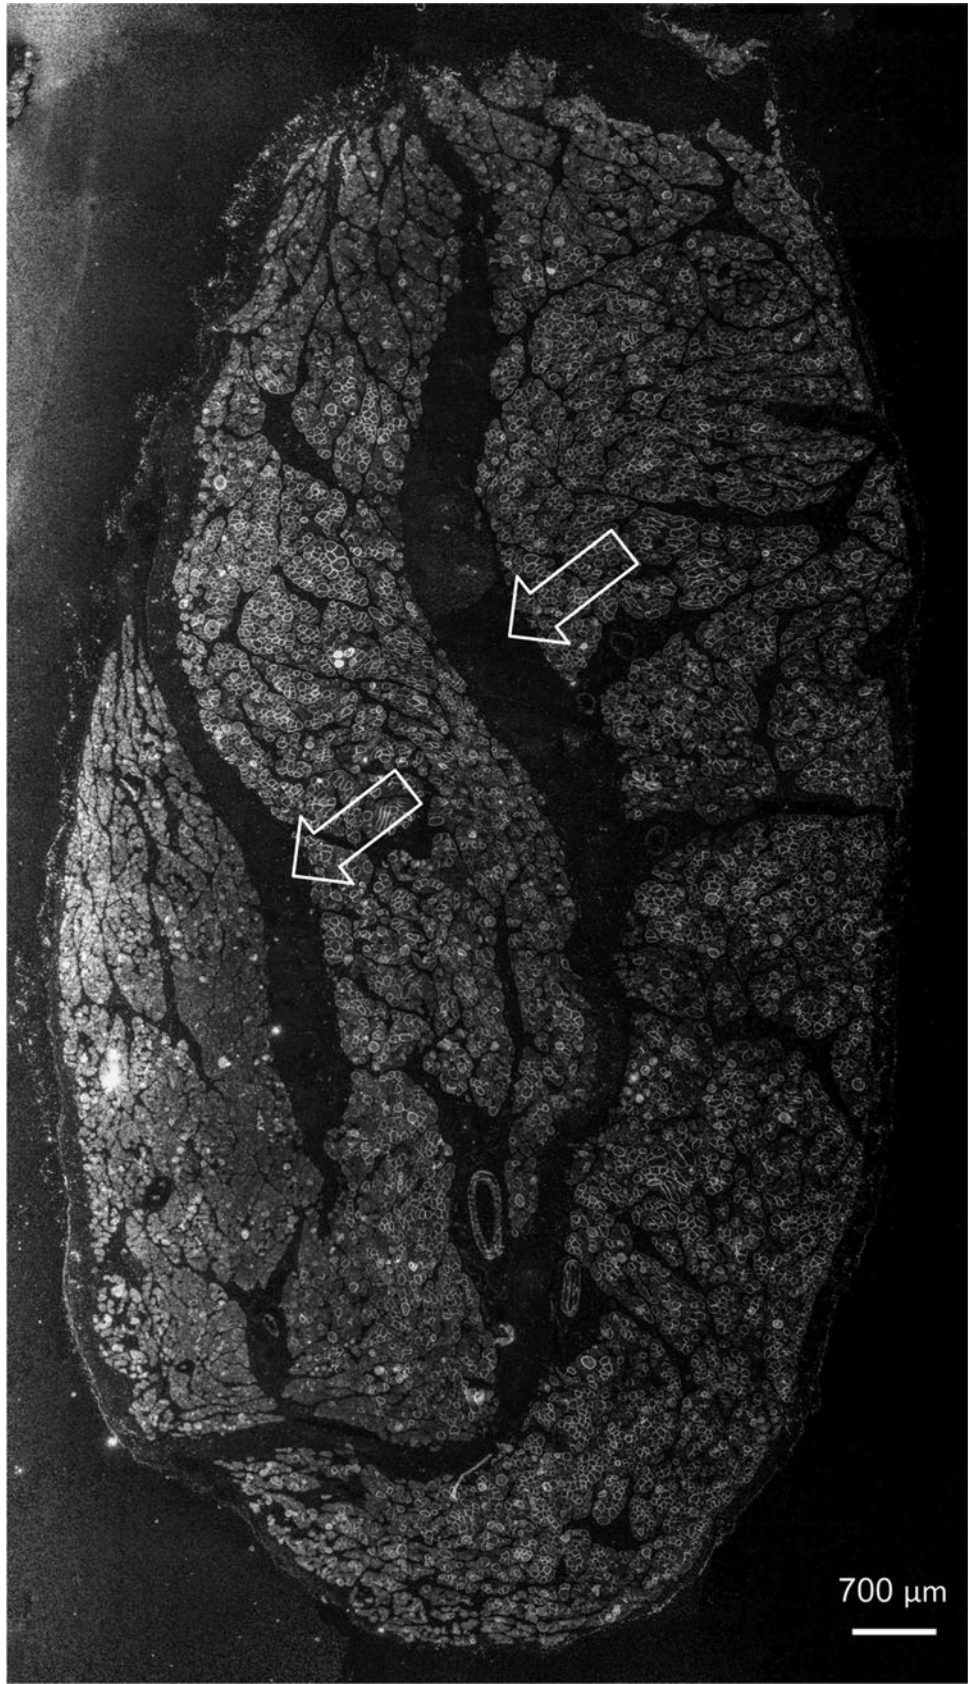

**Supplementary Figure 2.** Enlarged view of Fig. 2B. *Arrows indicate muscle tendon.*

Supplement: Supp_Figure2.pdf [file Supp_Figure2.pdf]
